# Supplementary material for: Is painting by elephants in zoos as enriching as we are led to believe?
Source: PeerJ. 2014 Jul 1;2:e471. doi: 10.7717/peerj.471 (PMC4103097; doi:10.7717/peerj.471)
Supplement: Supplemental Information 2 [file peerj-02-471-s002.xls]

## Sheet: Sheet1
1	2	3	4	5	6	7	8
Elephant	No. of Keepers	No. of people	Total Session time	Total	Total looking at keeper	Total looking	Total looking ahead
			(sec)	viewing eyes	(sec)	at scorer	(sec)				Looking at Keeper	Looking at Scorer	Looking Ahead		Looking at Keeper	Looking at Scorer	Looking Ahead		Looking at Keeper	Looking at Scorer	Looking Ahead		Looking at Keeper	Looking at Scorer	Looking Ahead
				(sec)		(sec)					96.5	14.25	32.75		66	14.25	19.75		85.5	8.5	62.25		18.75	9.5	79
Num-oi	3	5	120	65	50	0	15				5.01	3.69	2.12		1.72	5.16	3.92		3.99	3.47	3.85		3.88	4.14	6.58
Num-oi	2	3	126	102	58	9	35
Num-oi	3	6	300	191	136	15	40
Num-oi	1	2	260	216	142	33	41
		Mean	201.5	143.5	96.5	14.25	32.75				Looking at Keeper	Looking at Keeper	Looking at Keeper	Looking at Keeper		Looking at Scorer	Looking at Scorer	Looking at Scorer	Looking at Scorer		Looking Ahead	Looking Ahead	Looking Ahead	Looking Ahead
		SD	92.1358	71.6403	49.2443	13.9374	12.1209				96.5	66	85.5	18.75		14.25	14.25	14.25	8.5		32.75	19.75	62.25	79
		Sem	6.49069	5.98042	24.6221	6.96868	6.06046				5.01	1.72	3.99	3.88		3.69	3.69	5.16	3.47		2.12	3.92	3.85	6.58
Kulab	3	6	300	131	46	43	42
Kulab	3	5	110	76	72	0	4
Kulab	3	4	210	102	68	6	8
Kulab	3	7	125	109	78	8	25
		Mean	186.25	104.5	66	14.25	19.75
		SD	87.6903	22.6642	13.9523	19.4658	17.4045
		Sem	6.42545	2.21709	6.97615	9.73289	8.70225
Dokkoon	2	3	345	252	138	20	84			1	2	3	4	5	6	7	8	9
Dokkoon	2	4	155	124	57	0	67			Elephant	No.of Keepers	No.of people	Total	Total	Ears	Ears	Ears not forward	Ears back
Dokkoon	2	3	135	95	63	14	18							viewing ears	forward	flapping	(min/sec)	(min/sec)
Dokkoon	3	5	210	164	84	0	80						session time (min/sec)	(min/sec)	(min/sec)	(min/sec)
		Mean	211.25	158.75	85.5	8.5	62.25			Num-oi	3	5	2	1	0	0.01	0.56	0.03
		SD	94.6375	68.3002	36.8646	10.116	30.3795			Num-oi	2	3	2.06	1.27	0.32	0	0.53	0.02
		Sem	6.51126	5.42082	18.4323	5.058	15.1898			Num-oi	3	6	5	4	2.19	0	1.4	0		0	2	93	5
Mek Kapah	3	5	163	53	22	0	31			Num-oi	1	2	4.2	2.3	0.42	0.08	1.38	0.03		37	0	61	2
Mek Kapah	3	5	240	71	0	27	44			Kulab	3	6	5	2.09	1.05	0.12	0.53	0		58	0	42	0
Mek Kapah	2	6	280	185	13	11	161			Kulab	3	5	1.5	1.13	0.13	0.07	0.53	0		28	5	65	2
Mek Kapah	2	5	300	120	40	0	80			Kulab	3	4	3.3	2.02	0.21	1.16	0.26	0		30.75	1.75	65.25	2.25
		Mean	245.75	107.25	18.75	9.5	79			Kulab	3	7	2.05	1.15	0.5	0.04	0.21	0		24.0468	2.36291	21.0456	2.06155
		SD	60.5441	59.0614	16.8003	12.7671	58.4637			Dokoon	2	3	5.45	1.26	0.49	0	0.35	0.02		12.0234	1.18145	10.5228	1.03078
		Sem	3.86211	5.70302	8.40015	6.38357	29.2318			Dokoon	2	4	2.35	2	1.17	0.35	0.08	0		50	9	41	0
										Dokoon	2	3	2.15	1.15	1.15	0	0	0		18	10	72	0
										Dokoon	3	5	3.3	2.24	2.04	0.17	0.03	0		17	62	21	0
										Mek Kappah	3	5	2.43	2.1	1.24	0.46	0	0		67	5	28	0
										Mek Kappah	3	5	4	3.16	2.25	0.51	0	0		38	21.5	40.5	0
										Mek Kappah	2	6	4.4	2	1.32	0.28	0	0		24.6712	27.0863	22.5758	0
										Mek Kappah	2	5	5	3.07	2.5	0	0.17	0		12.3356	13.5431	11.2879	0
																				57	0	41	2
																				64	29	7	0
																				100	0	0	0
																				86	12	2	0
																				76.75	10.25	12.5	0.5
																				19.8221	13.7204	19.2267	1
																				9.91106	6.86021	9.61336	0.5
																				65	35	0	0
																				74	26	0	0
																				77	23	0	0
																				91	0	9	0
																				76.75	21	2.25	0
																				10.7819	14.8997	4.5	0
																				5.39096	7.44983	2.25	0

## Sheet: Sheet2
			Forward (45°-90° from body)	Forward (45°-90° from body)	Forward (45°-90° from body)	Forward (45°-90° from body)		Not forward (<45° from body)	Not forward (<45° from body)	Not forward (<45° from body)	Not forward (<45° from body)		Flapping	Flapping	Flapping	Flapping		Back (<10cm from body)	Back (<10cm from body)	Back (<10cm from body)	Back (<10cm from body)
			31	38	77	77		65	41	13	2		2	22	10	21		2	0	1	0
			12.02	12.34	9.91	5.39		10.52	11.29	9.61	2		1.18	13.54	6.86	7.44		1.03	0	0.5	0
																											Looking Ahead		Looking at Keeper	Looking at Keeper	Looking at Keeper	Looking at Keeper
																											74		67	66	54	17
																								0.940684	0.391632	0.39	0.922932		1.39789	0.342783	1.52082	0.387986
												46.07	8.58
												43.85	21.49
												47.32	52.24			1	4	13	2					Looking at keeper	Looking at keeper	Looking at keeper	Looking at keeper		Looking ahead	Looking ahead	Looking ahead	Looking ahead		Looking at scorer	Looking at scorer	Looking at scorer	Looking at scorer
												30.27	28.23			4	4	19	9					68	68	55	21		24	20	39	69		8	12	6	11
												41.8775	27.635			3	0	11	7					4.23	12.36	4.25	10.09		3.35	6.36	7.96	6.3		3.09	7.33	3.61	9.11
												7.87025	18.3177			5	2	6	11
												3.93513	9.15885			3.25	2.5	12.25	7.25					k	s	a
																1.70783	1.91485	5.37742	3.86221					77	0	23
																0.853913	0.957427	2.68871	1.93111					57	9	34
																								71	9	21
																								66	15	19
																								67.75	8.25	24.25
																								8.46069	6.18466	6.70199
																								4.23035	3.09233	3.35099
																								35	33	32
																								95	0	5
																								67	6	8
																								72	7	23
																								67.25	11.5	17
																								24.7167	14.6629	12.7279
																								12.3584	7.33144	6.36396
																								55	8	33
																								46	0	54
																								66	15	19
																								51	0	49
																								54.5	5.75	38.75
																								8.5049	7.22842	15.9243
																								4.25245	3.61421	7.96215
																								42	0	59
																								0	38	62
																								7	6	87
																								33	0	67
																								20.5	11	68.75
																								20.1742	18.2209	12.6062
																								10.0871	9.11043	6.30311
